# Supplementary material for: Three genes encoding AOP2, a protein involved in aliphatic glucosinolate biosynthesis, are differentially expressed in Brassica rapa
Source: PubMed Central journal article supplement (PMC4588880; doi:10.1093/jxb/erv331), 2015-07-17
Supplement: supp_erv331_jexbot153494_file001.pdf [file supp_erv331_jexbot153494_file001.pdf]

## Supplementary Data

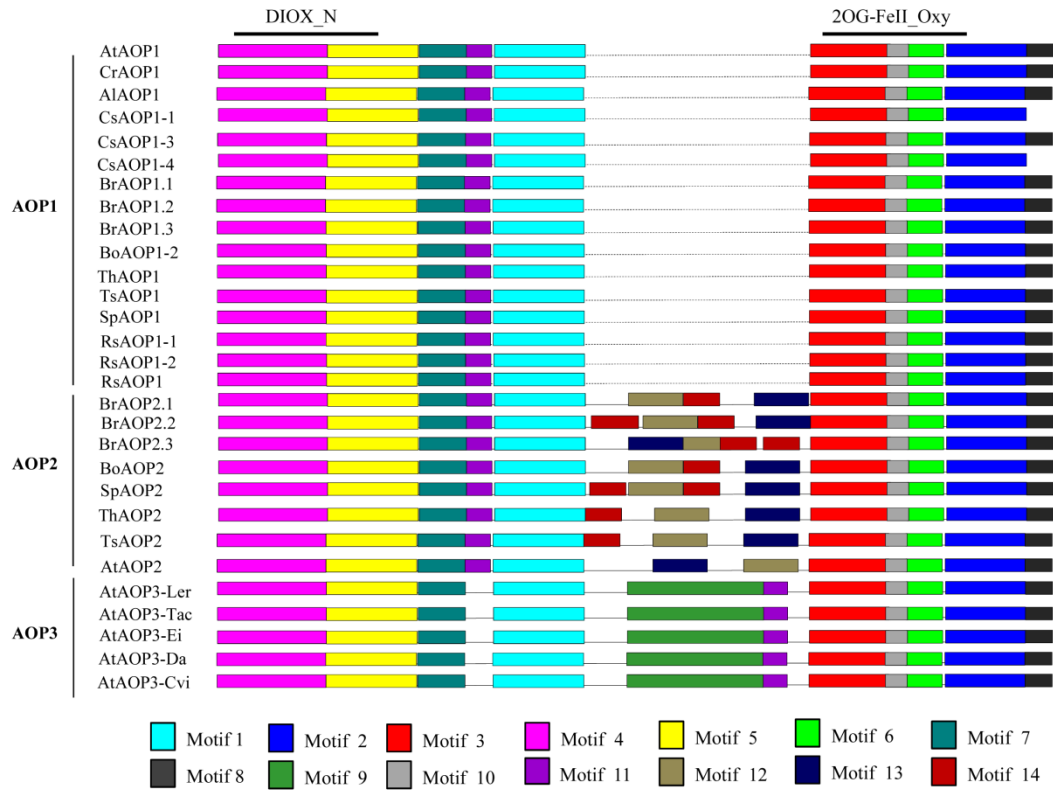

Fig. S1 Motif structures of AOP genes in Brassicaceae. Different colored boxes show protein motifs. At the top, DIOX\_N and 2OG-FeII\_Oxy indicate two conserved domains at the N-terminal and C-terminal regions of AOP proteins.

Table S1 Amino acid sequence identity (%) of *AOP2* among *A. thaliana*, *B. rapa* and *B. oleracea*

|                 | <i>AtAOP2</i> | <i>BrAOP2.1</i> | <i>BrAOP2.2</i> | <i>BrAOP2.3</i> | <i>BoAOP2</i> |
|-----------------|---------------|-----------------|-----------------|-----------------|---------------|
| <i>AtAOP2</i>   | -             | 60              | 56              | 55              | 59            |
| <i>BrAOP2.1</i> |               | -               | 74              | 78              | 96            |
| <i>BrAOP2.2</i> |               |                 | -               | 81              | 74            |
| <i>BrAOP2.3</i> |               |                 |                 | -               | 80            |
| <i>BoAOP2</i>   |               |                 |                 |                 | -             |

Table S2 *AOP* genes identified in 13 Brassicaceae species in the Brassica Database

| Species             | Gene ID                                        | Reference                   |
|---------------------|------------------------------------------------|-----------------------------|
| <i>A. arabicum</i>  | <i>AaAOP1</i> (AA_scaffold905_70)              | (Haudry et al., 2013)       |
| <i>C. rubella</i>   | <i>CrAOP1</i> (Carubv10003282m)                | (Slotte et al., 2013)       |
| <i>L. alabamica</i> | <i>LaAOP1</i> (LA_scaffold1283_7)              | (Haudry et al., 2013)       |
|                     | <i>LaAOP3</i> (LA_scaffold1283_8)              |                             |
|                     | <i>CsAOP1-1</i> (Csa02g007420.1)               |                             |
|                     | <i>CsAOP1-2</i> (Csa13g054180.1)               |                             |
| <i>C. sativa</i>    | <i>CsAOP1-3</i> (Csa13g054190.1)               | (Kagale et al., 2014)       |
|                     | <i>CsAOP1-4</i> (Csa08g050250.1)               |                             |
|                     | <i>CsAOP3</i> (Csa02g006400.1)                 |                             |
|                     | <i>AtAOP1</i> (AT4G03070)                      |                             |
|                     | <i>AtAOP2</i> (At4G03060)                      |                             |
|                     | <i>AtAOP3-Ler</i> (AF417859)                   |                             |
| <i>A. thaliana</i>  | <i>AtAOP3-Tac</i> (AF418282)                   | (Kliebenstein et al.,2001)  |
|                     | <i>AtAOP3-Ei</i> (AF418276)                    |                             |
|                     | <i>AtAOP3-Da</i> (AF418275)                    |                             |
|                     | <i>AtAOP3-Cvi</i> (AF418274)                   |                             |
| <i>A. lyrata</i>    | <i>AlAOP1</i> (AF417857.1)                     | (Kliebenstein et al., 2001) |
|                     | <i>AlAOP-2</i> (fgenes2_kg.6_3391_AT4G03060.1) |                             |
| <i>T. halophila</i> | <i>ThAOP1</i> (Thhalv10028799m)                | (Yang et al., 2013)         |
|                     | <i>ThAOP2</i> (Thhalv10028690m)                |                             |

|                      |                               |                            |
|----------------------|-------------------------------|----------------------------|
| <i>T. salsuginea</i> | <i>TsAOP1</i> (Tsa6g03220)    | (Wu et al., 2012)          |
|                      | <i>TsAOP2</i> (Tsa6g03210)    |                            |
| <i>S. parvula</i>    | <i>SpAOP1</i> (c0011_00285)   | (Dassanayake et al., 2011) |
|                      | <i>SpAOP2</i> (c0011_00284)   |                            |
| <i>S. irio</i>       | <i>SiAOP1</i> (SI_C230221_4)  | (Haudry et al., 2013)      |
|                      | <i>BrAOP1.1</i> (Bra034182)   |                            |
|                      | <i>BrAOP1.2</i> (Bra034181)   |                            |
|                      | <i>BrAOP1.3</i> (Bra000847)   |                            |
| <i>B. rapa</i>       | <i>BrAOP2.1</i> (Bra034180)   | (Wang et al., 2011)        |
|                      | <i>BrAOP2.2</i> (Bra000848)   |                            |
|                      | <i>BrAOP2.3</i> (Bra018521)   |                            |
|                      | <i>BoAOP1-1</i> (Bol030626)   |                            |
| <i>B. oleracea</i>   | <i>BoAOP1-2</i> (Bol030627)   | (Liu et al., 2014)         |
|                      | <i>RsAOP1-1</i> (Rsa10009537) |                            |
| <i>R. sativus</i>    | <i>RsAOP1-2</i> (Rsa10022481) | (Kitashiba et al., 2014)   |
|                      | <i>RsAOP1-3</i> (Rsa10022483) |                            |

Table S3 Primer sequences of *BrAOP2* genes used in coding sequences cloning and heterologous expression vector construction

| Gene ID                             | Primer sequence( 5'-3')         |
|-------------------------------------|---------------------------------|
| <i>BrAOP2.1</i> (Bra034180) F+ NcoI | <u>CATGCC</u> ATGGGTGCAGACACTCC |
| <i>BrAOP2.1</i> (Bra034180) R+ XhoI | <u>CTCGAG</u> TTATGCTCCAGAGACG  |
| <i>BrAOP2.2</i> (Bra000848) F+ NcoI | <u>CATGCC</u> ATGGGTTCAGACAGTAC |
| <i>BrAOP2.2</i> (Bra000848) R+ XhoI | <u>CTCGAG</u> TTAAGCTCCGGAGACG  |
| <i>BrAOP2.3</i> (Bra018521) F+ NcoI | <u>CATGCC</u> ATGGGTTCAGACAGTAC |
| <i>BrAOP2.3</i> (Bra018521) R+ XhoI | <u>CTCGAG</u> TCATGCTTCAGAGACGG |

The nucleotide sequences of restriction endonuclease sites are underlined.

Table S4 Mutagenic primers used to construct the mutant *BrAOP2* genes

| Mutant enzyme | Oligonucleotide(5'-3')                            | Codon change |
|---------------|---------------------------------------------------|--------------|
| H308L         | GTCTACCTTCTCT <b><u>T</u></b> ACTGATAAAAACCTTTTG  | CAT-CTT      |
|               | CAGATGGAAGAGAA <b><u>A</u></b> TGACTATTTTTGGAAAAC |              |
| D310A         | GTCTACCTTCTCTTACT <b><u>G</u></b> CTAAAAACCTTTTG  | GAT-GCT      |
|               | CAGATGGAAGAGAATGAC <b><u>G</u></b> ATTTTTGGAAAAC  |              |
| H308L         | GTCTCGTCCGTTTCT <b><u>T</u></b> AGAGTAAGAGTAAC    | CAT-CTT      |
|               | CAGAGCAGGCAAAGAA <b><u>A</u></b> TCTCATTCTCATTG   |              |
| R376W         | GAAAGAAGACAT <b><u>G</u></b> GTATTCAATAGC         | AGG-TGG      |
|               | CTTCTTCTGTAC <b><u>C</u></b> ATAAGTTATCG          |              |

The table shows the nucleotide sequences of the coding strand of the wild-type gene that surrounds the numbered residue and the complementary oligonucleotides used to create the indicated mutant genes. The histidine, aspartic acid, and arginine codons are printed in bold and the altered bases are underlined.

Table S5 *BrAOP2* primers used to clone the promoter sequences for vector construction

| Gene ID                        | Primer sequence( 5'-3')                |
|--------------------------------|----------------------------------------|
| <i>BrAOP2.1</i> Pro F + PstI   | <u>AAA</u> ACTGCAG GGAAGCAGCCGTAG      |
| <i>BrAOP2.1</i> Pro R+ XbaI    | <u>GCTCTAGA</u> TCTTTTCGCTGCAAATC      |
| <i>BrAOP2.2</i> Pro F+ PstI    | <u>AAA</u> ACTGCAG GAATTAATATTTTTGGCCC |
| <i>BrAOP2.2</i> Pro R+ XbaI    | <u>GCTCTAGA</u> TCTTCTTTCCTTTGGTG      |
| <i>BrAOP2.3</i> Pro F+ HindIII | <u>GCCAAGCTT</u> CTACGCATGCGTAACGCTC   |
| <i>BrAOP2.3</i> Pro R+ XbaI    | <u>GCTCTAGA</u> TAGATCACTGGAAGTTGGG    |

The nucleotide sequences of restriction endonuclease sites are underlined.

Table S6 Primer sequences of the *BrAOP2* and *BrGAPDH* genes used in the qRT-PCR analysis

| Gene ID                      | Primer sequence( 5'-3')  |
|------------------------------|--------------------------|
| <i>BrAOP2.1</i> F            | AAGAGTATGAGCGAAACGATCCAG |
| <i>BrAOP2.1</i> R            | CAGCATCAGCGTTAGCAGTTG    |
| <i>BrAOP2.2</i> F            | AACCTTGTCATTGTCACCAGT    |
| <i>BrAOP2.2</i> R            | CAAGAGTACCAGCGAAAGGAT    |
| <i>BrAOP2.3</i> F            | ACAAGAGTATCAGCGAAACAATCC |
| <i>BrAOP2.3</i> R            | ACTAGTATCAGCAACAACATTGGC |
| <i>BrGAPDH</i> (Bra016729) F | CCACTTGCCAAGGTTATCAACGAC |
| <i>BrGAPDH</i> (Bra016729) R | CAACTGAAACATCAACGGTGGG   |

**Table S7** The sequence of motifs in the middle part of AOP2 and AOP3 identified by MEME

| Motif | Width | Best possible match                                                                  |
|-------|-------|--------------------------------------------------------------------------------------|
| 9     | 80    | ITAAVGANVDNGANDNADGDANVNDDGASIGVKVNVDVGDDVNDNDS<br>VNIGVGVDINVETNVNGDLDAEANGDATAWVVG |
| 11    | 8     | HGNKSISE                                                                             |
| 12    | 29    | NADVNDIANGIANVHIDDDANAGANACVG                                                        |
| 13    | 29    | NADVNNANAGTRTSANVGVDGDSVKANGGAD                                                      |
| 14    | 21    | NHNGDDVNTSDCASVKSNDV                                                                 |

Table S8 Summary of various cis-regulatory elements present within 1.2 kb upstream region of *BrAOP2* homologs, obtained using PLACE database ([www.dna.affrc.go.jp/PLACE/](http://www.dna.affrc.go.jp/PLACE/)).

| cis-elements      | BrAOP2.1 | BrAOP2.2 | BrAOP2.3 |
|-------------------|----------|----------|----------|
| -10PEHVPSBD       | 1        | 1        | 2        |
| -300ELEMENT       |          | 2        | 2        |
| -300CORE          |          |          | 1        |
| 2SSEEDPROTBANAPA  | 1        |          |          |
| ABRELATERD1       | 1        | 3        | 4        |
| ACGTATERD1        | 2        | 6        | 8        |
| ABRERATCAL        |          | 3        | 2        |
| ACGTTBOX          |          | 2        | 2        |
| AGCBOXNPGLB       |          | 1        |          |
| AMYBOX1           | 1        | 1        | 1        |
| ANAERO1CONSENSUS  | 5        | 2        | 1        |
| ARR1AT            | 18       | 12       | 9        |
| ARFAT             |          |          | 1        |
| AUXREPSIAA4       | 1        |          |          |
| ASF1MOTIFCAMV     |          |          | 1        |
| BIHDIOS           | 2        | 3        |          |
| BOXIINTPATPB      | 2        | 1        | 1        |
| CAATBOX1          | 8        | 14       | 13       |
| CACGTGMOTIF       |          | 2        | 2        |
| CACTFTPPCA1       | 17       | 15       | 12       |
| CANBNNAPA         | 1        | 1        |          |
| CAREOSREP1        |          | 1        | 1        |
| CARGCW8GAT        | 2        | 4        |          |
| CATATGGMSAUR      | 4        | 4        |          |
| CBFHV             |          |          | 2        |
| CCA1ATLHCB1       |          | 2        | 1        |
| CCAATBOX1         |          |          | 2        |
| CGCGBOXAT         |          | 2        |          |
| CEREGLUBOX2PSLEGA |          |          | 1        |
| CGACGOSAMY3       |          |          | 2        |
| CIACADIANLELHC    | 1        |          | 3        |
| CRTDREHVCBF2      |          |          | 2        |
| CURECORECR        |          |          | 6        |
| DOFCOREZM         | 34       | 21       | 30       |
| DPBFCOREDCDC3     | 2        | 2        | 2        |
| DRE1COREZMRAB17   | 1        |          | 1        |
| E2FCONSENSUS      |          |          | 1        |
| EBOXBNNAPA        | 10       | 14       | 8        |

|                 |    |    |    |
|-----------------|----|----|----|
| EECCRCAH1       | 5  | 3  | 3  |
| ELRECOREPCR1    | 1  |    |    |
| ERELEE4         | 3  | 2  | 2  |
| GAREAT          | 1  | 1  | 1  |
| GATABOX         | 12 | 9  | 8  |
| GCCCORE         | 1  | 1  |    |
| GT1CONSENSUS    | 22 | 9  | 16 |
| GT1CORE         | 1  |    | 2  |
| GT1GMSCAM4      | 7  | 3  | 6  |
| GTGANTG10       | 5  | 11 | 9  |
| HEXAMERATH4     |    |    | 1  |
| HEXMOTIFTAH3H4  |    |    | 1  |
| IBOXCORE        | 3  |    | 5  |
| INRNTPSADB      | 1  | 3  | 1  |
| LTRE1HVBLT49    | 2  |    |    |
| IRO2OS          |    | 1  | 1  |
| L1BOXATPDF1     |    | 2  | 1  |
| LECPLEACS2      |    | 1  |    |
| MARABOX1        | 1  |    |    |
| MARTBOX         | 5  | 1  | 3  |
| MYB1AT          | 3  | 3  | 6  |
| MYB2AT          | 2  |    |    |
| MYB1LEPR        |    | 1  | 1  |
| MYB2CONSENSUSAT | 2  | 1  | 1  |
| MYBCORE         | 2  | 2  | 2  |
| MYBCOREATCYCB1  |    | 1  | 1  |
| MYBGAHV         | 1  | 1  | 1  |
| MYBPLANT        |    |    | 1  |
| MYCATERD1       | 2  |    | 1  |
| MYCATRD22       | 2  |    | 1  |
| MYBST1          |    | 2  |    |
| MYCCONSUSAT     | 10 | 14 | 8  |
| NODCON1GM       | 3  | 1  | 6  |
| NODCON2GM       | 2  | 3  |    |
| NTBBF1ARROLB    | 2  | 1  |    |
| OSE1ROOTNODULE  | 5  | 4  | 6  |
| P1BS            |    | 4  |    |
| PALBOXAPC       |    | 1  |    |
| POLASIG1        | 2  | 7  | 4  |
| POLASIG2        | 2  | 5  | 1  |
| POLASIG3        | 3  | 8  | 2  |
| POLLEN1LELAT52  | 16 | 6  | 11 |
| PREATPRODH      | 1  |    | 1  |

|                       |   |    |   |
|-----------------------|---|----|---|
| PYRIMIDINEBOXHVEPB1   | 1 |    |   |
| PYRIMIDINEBOXOSRAMY1A | 3 |    | 3 |
| QELEMENTZMZM13        | 1 |    |   |
| RAV1AAT               | 4 | 3  | 7 |
| RBCSCONSENSUS         | 1 |    | 1 |
| REALPHALGLHCB21       | 1 | 1  | 4 |
| RHERPATEXPA7          |   | 1  | 2 |
| ROOTMOTIFTAPOX1       | 9 | 11 | 5 |
| SEF1MOTIF             | 1 |    |   |
| RYREPEATBNNAPA        |   |    | 1 |
| SEF3MOTIFGM           | 1 |    |   |
| S1FBOXSORPS1L21       |   |    | 1 |
| SBOXATRBCS            |   |    | 1 |
| SEBFCONSSTPR10A       |   | 2  | 1 |
| SEF3MOTIFGM           |   | 1  | 2 |
| SEF4MOTIFGM7S         | 3 | 4  | 5 |
| SITEIIATCYTC          |   |    | 1 |
| SORLIP1AT             | 1 |    | 1 |
| SORLIP2AT             |   |    | 1 |
| SORLREP3AT            |   | 1  |   |
| SURECOREATSULTR11     | 1 | 2  | 4 |
| SV40COREENHAN         |   |    | 1 |
| TAAAGSTKST1           | 6 | 5  | 5 |
| TATABOX2              | 3 | 4  | 1 |
| TATABOX3              |   | 2  |   |
| TATABOX4              | 1 | 5  |   |
| TATABOX5              | 4 | 4  | 2 |
| TBOXATGAPB            | 3 |    | 3 |
| TGTCACACMCUCUMISIN    | 1 |    |   |
| TATABOXOSPAL          |   | 1  |   |
| TATAPVTRNALEU         |   | 2  |   |
| TATCCAOSAMY           |   | 1  |   |
| TGTCACACMCUCUMISIN    |   | 1  |   |
| TGACGTVMAMY           |   |    | 1 |
| WBBOXPCWRKY1          | 1 |    |   |
| WBOXATNPR1            | 3 |    | 2 |
| WBOXHVISO1            | 1 |    | 2 |
| WBOXNTERF3            | 3 | 1  | 2 |
| WRKY7IOS              | 5 | 4  | 3 |
|                       |   |    |   |
